# Supplementary material for: Efficient and stable electrorheological fluids based on chestnut-like cobalt hydroxide coupled with surface-functionalized carbon dots
Source: Royal Society of Chemistry journal article supplement (doi:10.1039/d2sm00176d), 2022-01-01

## Supplementary Information

### Efficient and Stable Electrorheological Fluids Based on Chestnut-like Cobalt Hydroxide Coupled with Surface-functionalized Carbon Dots

*Yudai Liang<sup>a</sup>, Yihao Liu<sup>a</sup>, Yaozhong Zhou<sup>a</sup>, Quan Shi<sup>a</sup>, Mengying Zhang<sup>b\*</sup>, Yancheng Li<sup>c</sup>, Weijia Wen<sup>a,d</sup>, Linyan Feng<sup>a\*</sup> and Jinbo Wu<sup>a\*</sup>*

<sup>a</sup> Materials Genome Institute, Shanghai University, Shanghai 200444, China.

<sup>b</sup> Department of Physics, Shanghai University, Shanghai 200444, China.

<sup>c</sup> Centre for Built Infrastructure Research, School of Civil and Environmental Engineering, Faculty of Engineering and Information Technology, University of Technology, Sydney, NSW 2007, Australia.

<sup>d</sup> Department of Physics, The Hong Kong University of Science and Technology, Hong Kong, China.

#### Corresponding Author

E-mail: [zhang.my@t.shu.edu.cn](mailto:zhang.my@t.shu.edu.cn); [lingyanfeng@t.shu.edu.cn](mailto:lingyanfeng@t.shu.edu.cn); [jinbowu@t.shu.edu.cn](mailto:jinbowu@t.shu.edu.cn)

Figure. S1. EDS overlap (a and b) and element mapping profiles (c-f) of the  $\text{Co}(\text{OH})_2@\text{CDs}$ -100 sample.

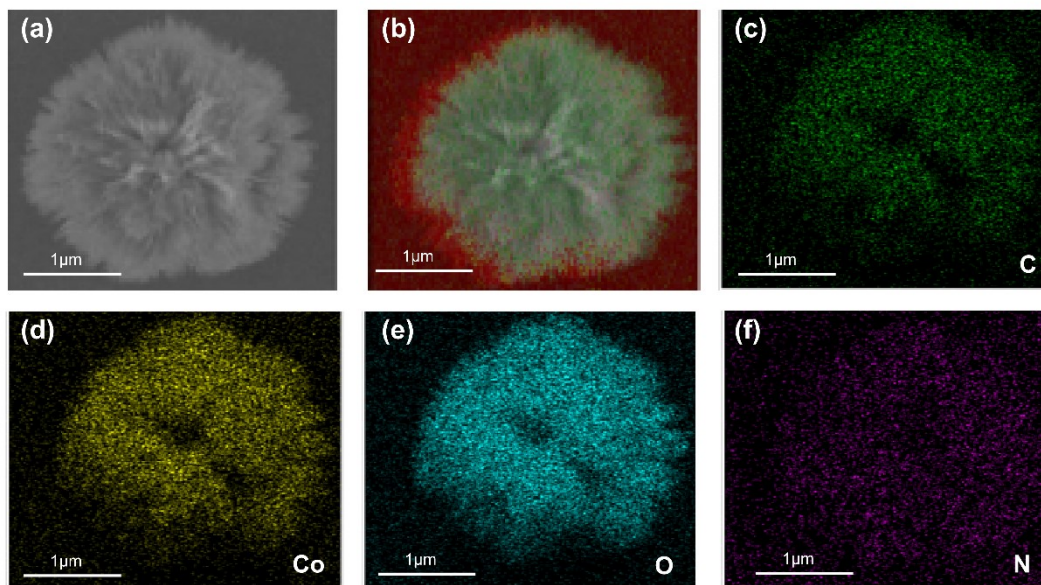

Figure. S2. SEM images of (a, b, c)  $\text{Co(OH)}_2@\text{CDs-20}$ , (d, e, f)  $\text{Co(OH)}_2@\text{CDs-50}$  and (g, h, i)  $\text{Co(OH)}_2@\text{CDs-100}$  under different magnifications.

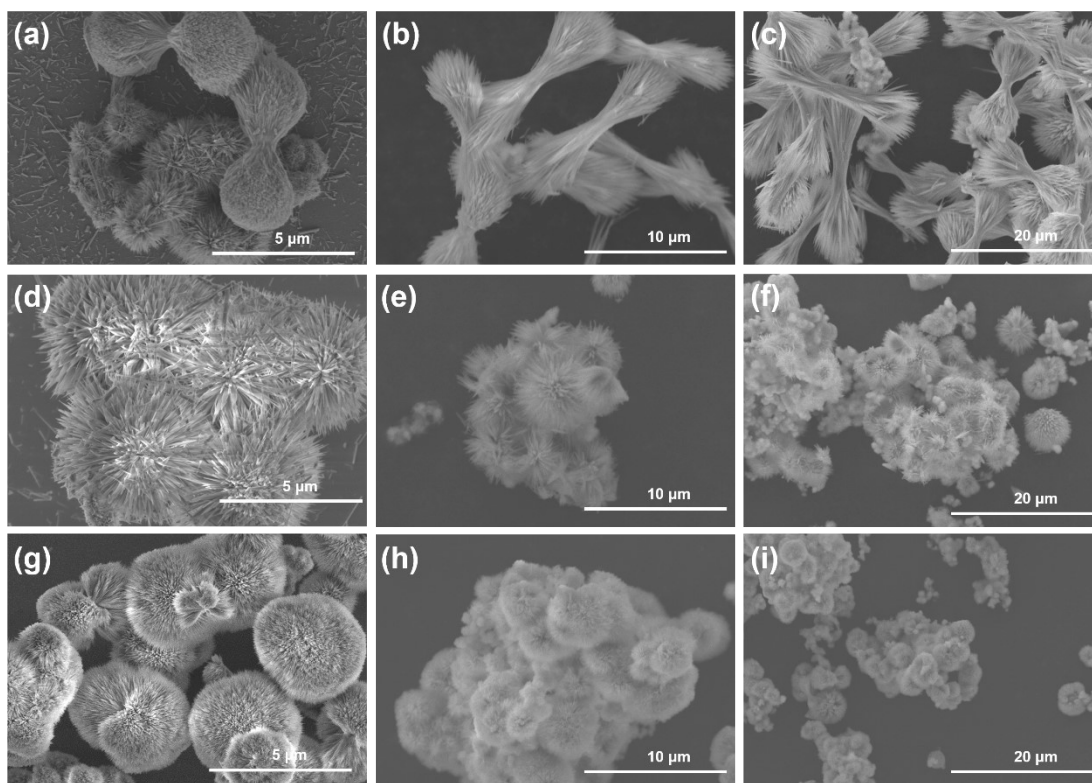

Figure. S3. SEM images of  $\text{Co(OH)}_2\text{@CDs-100}$  particles prepared at 80°C (a), 100°C (b), 150°C (c), 200°C (d) hydrothermal synthesis temperature.

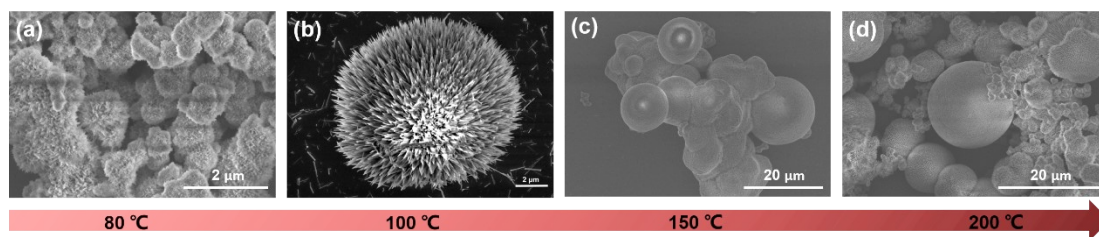

Figure. S4. (a) XRD patterns and (b) FTIR spectra of  $\text{Co(OH)}_2\text{@CDs-x}$  ( $x=20, 50,$  and 100).

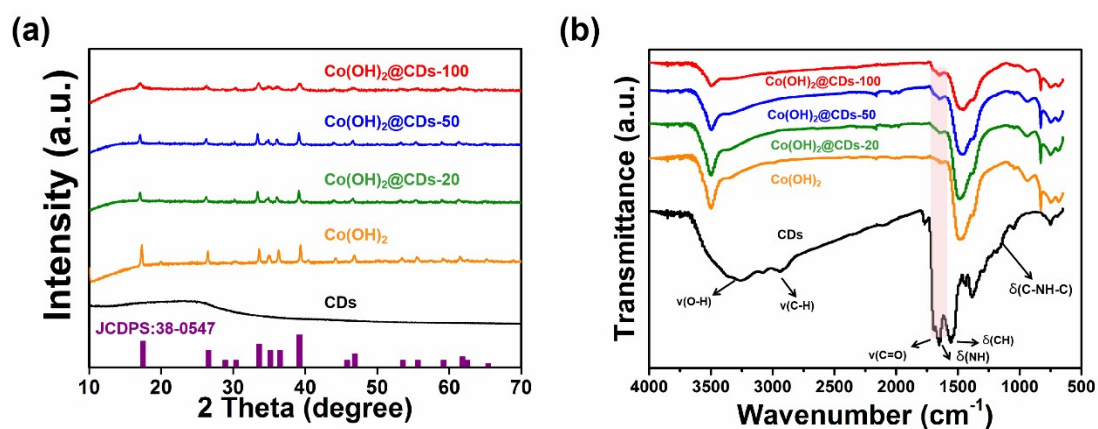

Figure. S5. Optical microscopy images of  $\text{Co}(\text{OH})_2@$ CDs-100-ERF with particle mass fractions of 2% (a) without and (b) with the application of an E (1 kV/mm).

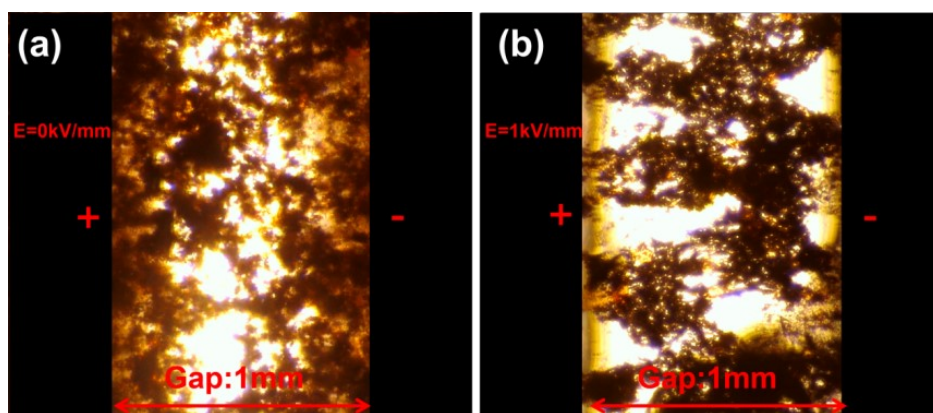

Figure. S6. The shear stress versus time curve of  $\text{Co}(\text{OH})_2@$ CDs-100-ERF with particle mass fractions of 20wt% at a shear rate of  $0.1 \text{ s}^{-1}$ .

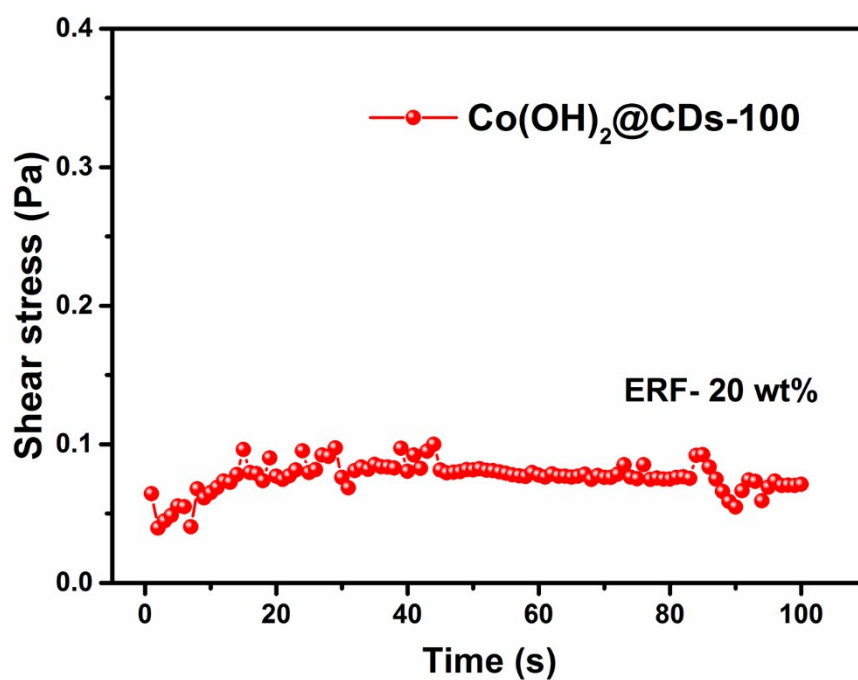

Figure. S7. Permittivity ( $\epsilon'$ ) and loss factor ( $\epsilon''$ ) as a function of electric field frequency for  $\text{Co(OH)}_2@$ CDs-100 (a), 50 (b), 20 (c), 0 (a)-ERFs with a particle mass fraction of 20%.

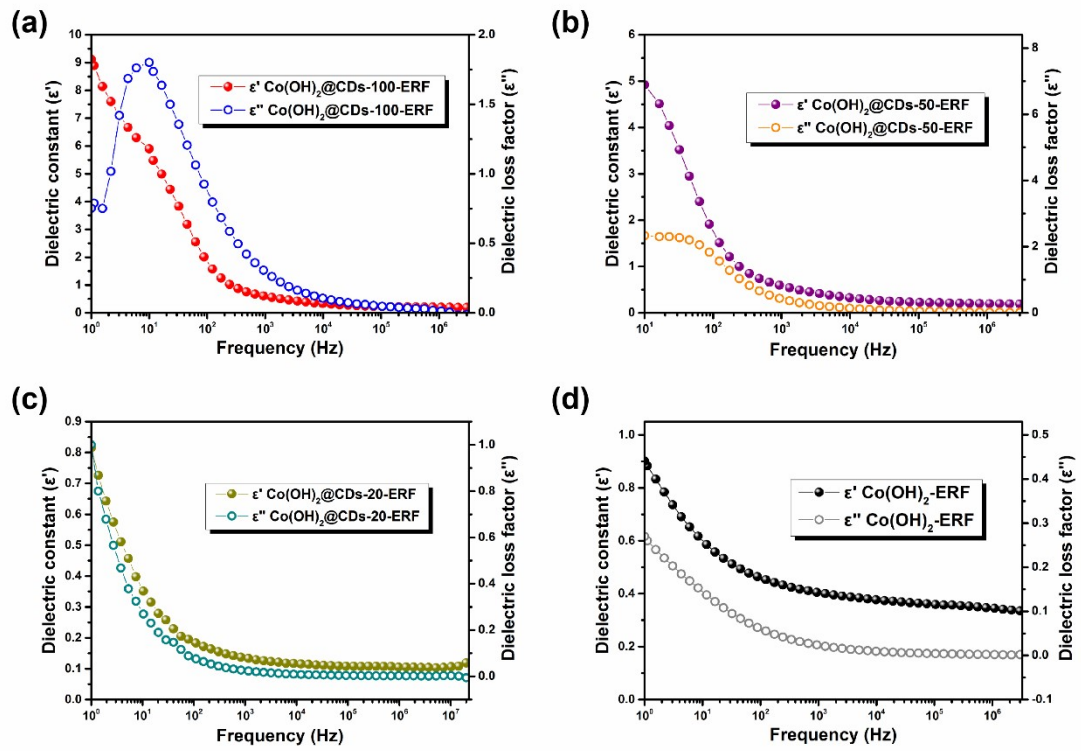

Figure. S8. SEM image of the aligned chains of  $\text{Co(OH)}_2@\text{CDs-100}$  particles under different magnifications.

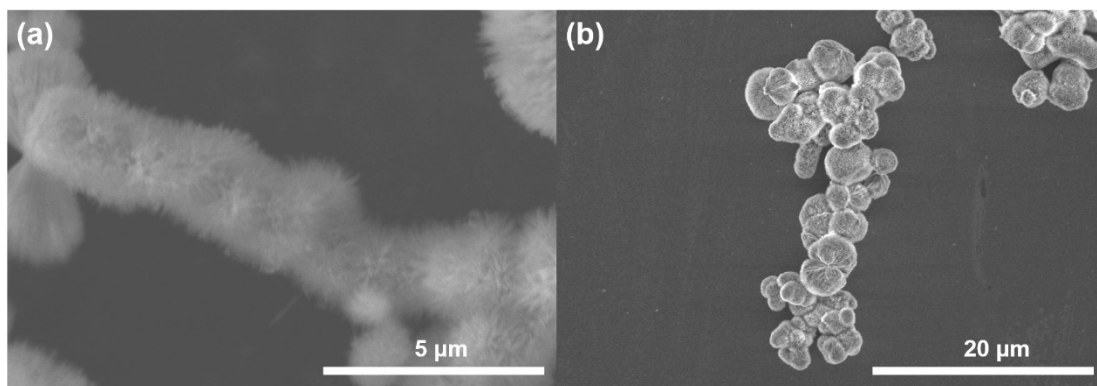

Supplement: d2sm00176d1.pdf [file d2sm00176d1.pdf]
